# Supplementary material
Source: PubMed Central journal article supplement (PMC3250191)
Supplement: 1108497108_pnas.201108497SI.pdf [file 1108497108_pnas.201108497SI.pdf]

# Supporting Information

Bosmans et al. 10.1073/pnas.1108497108

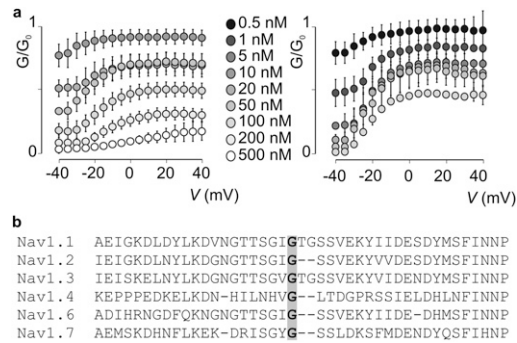

**Fig. S1.** Apparent affinity measurement of PaurTx3 for rNav1.2a and G1079C. (A) Voltage-dependent inhibition of rNav1.2a (Left) and the mutant channel (Right) by PaurTx3 over a range of concentrations.  $G/G_0$  is the fraction of uninhibited current elicited by a depolarization to the indicated voltages ( $V$ ). The values of  $G/G_0$  measured in the plateau phase at negative voltages where toxin-bound channels do not open were taken as the fraction unbound ( $F_u$ ). (B) Sequence alignment of a portion of the domain II-domain III intracellular loop of various Nav channel isoforms. Conserved glycines are highlighted by a gray background.



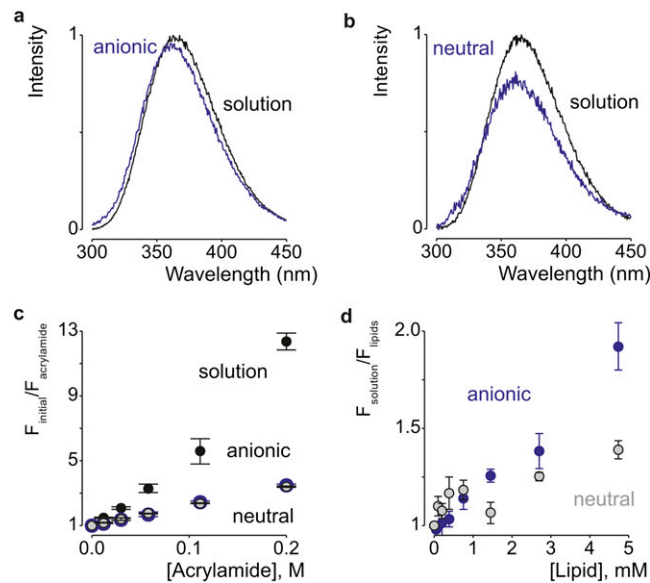

**Fig. S3.** Partitioning of PaurTx3 into artificial membranes. Partitioning of PaurTx3 into neutral (POPC) or anionic (1:1 mix of POPC:POPG) membranes was assayed by using tryptophan fluorescence. Fluorescence spectra for 10  $\mu$ M toxins in 10 mM HEPES and 1 mM EDTA at pH 7.6 were recorded between 300 and 400 nm (5 nm band pass, 0° polarizer) by using an excitation wavelength of 280 nm (5 nm band pass, 90° polarizer) (SPEX FluoroMax 3 spectrofluorometer) and corrected for vesicle scattering. (A and B) Fluorescence emission spectra of PaurTx3 in the absence (black) or presence (blue) of 4 mM anionic (A) and neutral (B) membranes, respectively. (C) Stern–Volmer plots for acrylamide quenching of tryptophan fluorescence in solution (black) and in the presence of lipid membranes. Gray, neutral membranes; blue, anionic membranes. (D) Fluorescence intensity at 320 nm plotted as a function of available lipid concentration (60% of total lipids).  $n = 3$ ; error bars are SEM.

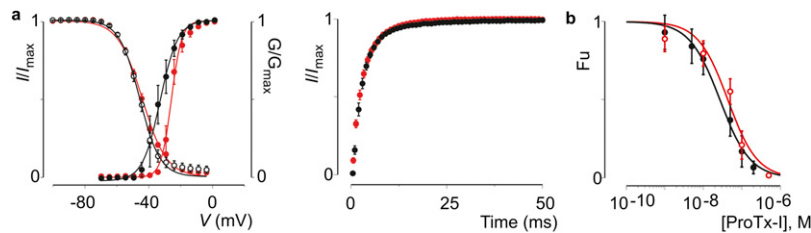

**Fig. S4.** Effects of cholesterol depletion on the gating properties of G1079C. (A) Deduced conductance–voltage and steady-state inactivation relationships (Left) and recovery from inactivation (Right) before (black) and after (red) 5 mM methyl- $\beta$ -cyclodextrin are shown. (B) Apparent affinity of ProTx-I interacting with G1079C before (black) and after (red) membrane cholesterol depletion. Concentration dependence for toxin inhibition plotted as  $F_u$  measured at negative voltages is shown. Solid line represents a fit with the Hill equation.  $n = 3$ , and error bars represent SEM.

**Table S1.** Gating characteristics of rNav1.2a and G1079C before and after depalmitoylation

|                         | rNav1.2a           | G1079C             |
|-------------------------|--------------------|--------------------|
| Before depalmitoylation |                    |                    |
| Activation, $V_{1/2}$   | $-24.3 \pm 0.6$ mV | $-33.6 \pm 0.3$ mV |
| Inactivation, $V_{1/2}$ | $-44.8 \pm 0.5$ mV | $-46.2 \pm 0.2$ mV |
| Recovery, $\tau$        | $5.0 \pm 0.1$ ms   | $3.3 \pm 0.1$ ms   |
| After depalmitoylation  |                    |                    |
| Activation, $V_{1/2}$   | $-24.2 \pm 0.3$ mV | $-28.3 \pm 0.5$ mV |
| Inactivation, $V_{1/2}$ | $-55.2 \pm 0.5$ mV | $-55.6 \pm 0.4$ mV |
| Recovery, $\tau$        | $13.2 \pm 0.1$ ms  | $12.8 \pm 0.1$ ms  |

Values were obtained by fitting data with single Boltzmann functions ( $V_{1/2}$ ) or a single exponential function ( $\tau$ ).

**Table S2. Apparent affinity values for toxins interacting with rNav1.2a and G1079C in control membranes and after 2-Br-palmitate addition obtained using the Hill equation**

|                                | rNav1.2a                             | G1079C                               |
|--------------------------------|--------------------------------------|--------------------------------------|
| Before 2-Br-palmitate addition |                                      |                                      |
| PaurTx3                        | 27 ± 2 nM<br>( <i>n</i> = 1.2 ± 0.1) | 1 ± 1 nM<br>( <i>n</i> = 1.0 ± 0.2)  |
| ProTx-II                       | 15 ± 1 nM<br>( <i>n</i> = 1.3 ± 0.1) | 2 ± 1 nM<br>( <i>n</i> = 1.1 ± 0.1)  |
| ProTx-I                        | 27 ± 3 nM<br>( <i>n</i> = 1.1 ± 0.1) | 26 ± 3 nM<br>( <i>n</i> = 1.1 ± 0.1) |
| AaHII                          | 4 ± 1 nM<br>( <i>n</i> = 1.1 ± 0.1)  | 3 ± 1 nM<br>( <i>n</i> = 1.0 ± 0.1)  |
| After 2-Br-palmitate addition  |                                      |                                      |
| PaurTx3                        | 10 ± 1 nM<br>( <i>n</i> = 1.0 ± 0.1) | 9 ± 1 nM<br>( <i>n</i> = 0.9 ± 0.1)  |
| ProTx-II                       | 3 ± 1 nM<br>( <i>n</i> = 1.2 ± 0.1)  | 3 ± 1 nM<br>( <i>n</i> = 1.0 ± 0.1)  |
| ProTx-I                        | 25 ± 4 nM<br>( <i>n</i> = 1.1 ± 0.2) | 28 ± 4 nM<br>( <i>n</i> = 0.9 ± 0.1) |
| AaHII                          | 3 ± 1 nM<br>( <i>n</i> = 1.1 ± 0.1)  | 5 ± 1 nM<br>( <i>n</i> = 1.0 ± 0.1)  |

Hill coefficients (*n*) are given in parentheses.

**Table S3. Gating characteristics comparison of rNav1.2a, rNav1.2a<sup>AAA</sup>, and C1182A before and after depalmitoylation**

|                         | rNav1.2a       | rNav1.2a <sup>AAA</sup> | C1182A         |
|-------------------------|----------------|-------------------------|----------------|
| Before depalmitoylation |                |                         |                |
| Activation, $V_{1/2}$   | -24.3 ± 0.6 mV | -35.6 ± 0.3 mV          | -31.7 ± 0.1 mV |
| Inactivation, $V_{1/2}$ | -44.8 ± 0.5 mV | -57.6 ± 0.3 mV          | -53.5 ± 0.2 mV |
| Recovery, $\tau$        | 5.0 ± 0.1 ms   | 11.2 ± 0.2 ms           | 7.6 ± 0.2 ms   |
| After depalmitoylation  |                |                         |                |
| Activation, $V_{1/2}$   | -24.2 ± 0.3 mV | -32.8 ± 0.1 mV          | -34.5 ± 0.2 mV |
| Inactivation, $V_{1/2}$ | -55.2 ± 0.5 mV | -53.7 ± 0.3 mV          | -50.8 ± 0.3 mV |
| Recovery, $\tau$        | 13.2 ± 0.1 ms  | 17.9 ± 1.0 ms           | 14.9 ± 2.0 ms  |

Values were obtained by fitting data with single Boltzmann functions ( $V_{1/2}$ ) or a single exponential function ( $\tau$ ).

**Table S4. Apparent affinity values for toxins interacting with rNav1.2a, rNav1.2a<sup>AAA</sup>, and C1182A in control membranes and after 2-Br-palmitate addition obtained using the Hill equation**

|          | rNav1.2a                             | rNav1.2a <sup>AAA</sup>              | C1182A                               |
|----------|--------------------------------------|--------------------------------------|--------------------------------------|
| PaurTx3  | 27 ± 2 nM<br>( <i>n</i> = 1.2 ± 0.1) | 5 ± 1 nM<br>( <i>n</i> = 1.0 ± 0.1)  | 10 ± 1 nM<br>( <i>n</i> = 1.0 ± 0.1) |
| PaurTx3* | 10 ± 1 nM<br>( <i>n</i> = 1.0 ± 0.1) | 10 ± 1 nM<br>( <i>n</i> = 1.2 ± 0.1) | 6 ± 1 nM<br>( <i>n</i> = 1.0 ± 0.1)  |

Hill coefficients (*n*) are given in parentheses.

\*Data shown for after 2-Br-palmitate addition.
